# Supplementary material
Source: HighWire-hosted journal article supplement (https://www.cmajopen.ca/highwire/filestream/80854/field_highwire_adjunct_files/2/open-2014-0049-3-at.pdf)
Supplement: open-2014-0049-3-at.pdf [file open-2014-0049-3-at.pdf]

**Appendix 3** (as supplied by the authors): Five-year transition matrix estimating the probability of changing cost states within a 5-year period, where rows represent the current cost state and columns represent the future cost state in 5 years\*

|                    |                    | Future Cost State (in 5 years) |               |                   |                  |                    |                   |                 |                |
|--------------------|--------------------|--------------------------------|---------------|-------------------|------------------|--------------------|-------------------|-----------------|----------------|
|                    |                    | Top 5% (Alive)                 | Top 5% (Died) | Top 5-10% (Alive) | Top 5-10% (Died) | Bottom 90% (Alive) | Bottom 90% (Died) | No Cost (Alive) | No cost (Died) |
| Current Cost State | Top 5% (Alive)     | 1.3                            | 0.3           | 1.4               | 0.2              | 26.9               | 0.8               | 51.8            | 17.3           |
|                    | Top 5% (Died)      | 0                              | 0             | 0                 | 0                | 0                  | 0                 | 0               | 100            |
|                    | Top 5-10% (Alive)  | 1.3                            | 0.3           | 1.4               | 0.2              | 27.4               | 0.9               | 52.7            | 15.9           |
|                    | Top 5-10% (Died)   | 0                              | 0             | 0                 | 0                | 0                  | 0                 | 0               | 100            |
|                    | Bottom 90% (Alive) | 1.3                            | 0.3           | 1.4               | 0.2              | 28.2               | 0.9               | 54.3            | 13.3           |
|                    | Bottom 90% (Died)  | 0                              | 0             | 0                 | 0                | 0                  | 0                 | 0               | 100            |
|                    | No cost (Alive)    | 1.3                            | 0.3           | 1.4               | 0.2              | 28.0               | 0.9               | 53.8            | 14.0           |
|                    | No cost (Died)     | 0                              | 0             | 0                 | 0                | 0                  | 0                 | 0               | 100            |

\*All estimates are reported as percentages (%). Within the matrix, all rows sum to 100%. Patients with no hospitalizations are categorized as “No cost (Alive).”
